# Supplementary material for: Essential roles of B cell subsets in the progression of MASLD and HCC
Source: PubMed Central journal article supplement (PMC11602976; doi:10.1016/j.jhepr.2024.101189), 2024-08-22
Supplement: mmc1.pdf [file mmc1.pdf]

# Essential roles of B cell subsets in the progression of MASLD and HCC

Nataliia Petriv, Huizhen Suo, Inga Hochnadel, Kai Timrott, Nina Bondarenko, Lavinia Neubert, Elena Reinhard, Nils Jedicke, Patrick Kaufhold, Carlos Alberto Guzmán, Ralf Lichtinghagen, Michael P. Manns, Heike Bantel, Tetyana Yevsa

## Table of contents

|                                          |    |
|------------------------------------------|----|
| Abbreviations.....                       | 2  |
| Supplementary materials and methods..... | 3  |
| Supplementary figures.....               | 8  |
| Graphical abstract legend .....          | 20 |
| Supplementary tables.....                | 21 |
| Supplementary references.....            | 27 |

## **Abbreviations**

|         |                                                               |
|---------|---------------------------------------------------------------|
| AFP     | alpha-1-fetoprotein                                           |
| BMI     | body mass index                                               |
| Breg    | B regulatory cell                                             |
| BSA     | bovine serum albumin                                          |
| DAPI    | 4',6-diamidino-2-phenylindole                                 |
| DN      | double-negative                                               |
| EDTA    | ethylenediaminetetraacetic acid                               |
| FBS     | fetal bovine serum                                            |
| GGT     | gamma-glutamyltransferase                                     |
| H&E     | hematoxylin and eosin                                         |
| HCC     | hepatocellular carcinoma                                      |
| HDI     | hydrodynamic tail vein injection                              |
| HFD     | high-fat diet                                                 |
| HRP     | horseradish peroxidase                                        |
| IF      | immunofluorescence                                            |
| IHC     | immunohistochemistry                                          |
| IRES    | internal ribosome entry site                                  |
| LmAIO   | <i>Listeria monocytogenes</i> $\Delta actA/\Delta inlB$ + Ova |
| MBCs    | memory B cells                                                |
| MN      | mature naïve                                                  |
| MASLD   | metabolic dysfunction-associated steatotic liver disease      |
| NCD     | normal chow diet                                              |
| NSw     | non-switched                                                  |
| Ova     | ovalbumin                                                     |
| PBS     | phosphate buffered saline                                     |
| PBs     | plasmablasts                                                  |
| PD-L1   | programmed death-ligand 1                                     |
| SB13    | <i>Sleeping Beauty 13</i>                                     |
| Sw MBCs | switched memory B cells                                       |

## **Supplementary materials and methods**

### **Human samples**

Fresh blood samples, obtained from the patients with metabolic dysfunction-associated steatotic liver disease (MASLD), were prepared for FACS analysis. Liver tissue samples (resected material after surgeries) were collected only from the patients with hepatocellular carcinoma (HCC). The tumor liver tissues were harvested for immunohistochemical (IHC) and immunofluorescent (IF) analyses. The prospective study using all human material (blood and liver tissues obtained after surgeries) was conducted in accordance with the Helsinki Declaration. It was approved by the Ethics Committee of the MHH (approval numbers: 3261\_BO\_K\_2016, 7825\_BO\_K\_2018 and 8742\_BO\_K\_2019). The appropriate informed consent was received from all the patients.

### **Mouse strains, animal housing and diets used**

Wild-type (WT) C57BL/6J mice were purchased from Charles River Laboratories. *P19<sup>Arf/-</sup>* mice [1] were obtained in a C57BL/6J background as described previously [2, 3]. B-cell-deficient mice (B6.129S2-Igh-6<sup>tm1Cgn/J</sup> ( $\mu$ MT) [4] and B6.129P2-Igh-J<sup>tm1Cgn/J</sup> (JHT) [5]) were purchased from the Jackson Laboratory and were bred at the animal facility of the MHH, Hannover, Germany.

Mice were maintained on a 12 h light and dark cycle with *ad libitum* access to water and a normal chow diet composed of 10% fat. For inducing MASLD, three-weeks-old C57BL/6J female mice were fed with a 60% high-fat diet (HFD, Envigo Teklad TD06414) for 14 weeks long, as previously established [6-8].

### **B-cell depletion and combination treatment with $\alpha$ -CD20**

B-cell depletion was carried out using a monoclonal  $\alpha$ -CD20 antibody from BioLegend (clone SA271G2). Mice were treated with 250  $\mu$ g  $\alpha$ -CD20 antibody administered intraperitoneally (i.p.) twice per week [9, 10]. The combination therapy, comprising the  $\alpha$ -CD20 treatment and a vaccination with a double-deleted vaccine strain *Listeria monocytogenes*  $\Delta$ *actA*/ $\Delta$ *inlB*, expressing ovalbumin (designated LmAIO), was performed in HCC-Ova mouse model induced in *p19<sup>Arf/-</sup>* mice, as described previously [11]. All antibodies used in the study are listed in Table S3.

### **Isolation of human peripheral blood mononuclear cells (PBMCs)**

Peripheral human blood was obtained by venepuncture and collected into tubes containing ethylenediaminetetraacetic acid (EDTA) as an anticoagulant. PBMCs were obtained using Ficoll-Paque PLUS (GE Healthcare, USA) density gradient centrifugation, according to the

manufacturer's instructions. Briefly, whole blood was diluted with an equal volume of PBS (at room temperature), underlain with Ficoll-Paque (at room temperature), then centrifuged (400×g, 30 min, 21 °C) on a Heraeus Megafuge 40R (Thermo Fisher Scientific, USA) without break. PBMCs were collected from the Ficoll-Paque-plasma interface into a 50 ml tube (Greiner Bio-One, Germany), washed twice in PBS (100×g, 10 min, 4 °C), and re-suspended at 10<sup>6</sup> cells/ml in complete RPMI 1640 (Gibco, USA). Then, the total number of cells was counted using 0.4% trypan blue (Sigma Aldrich, USA) and a cell counter (LUNA-FL, Logos Biosystems, South Korea).

### **Vector design and induction of HCC using hydrodynamic tail vein injection (HDI)**

*Sleeping Beauty 13 (SB13)* transposase, *NRAS*<sup>G12V</sup> (*CaM*), and *Myc-NRAS*<sup>G12V</sup>-*IRES* (*CaMIN*) encoding transposon vectors have been described recently [2, 8, 12]. DNA vectors (transposon and transposase) for HDI were prepared using the QIAGEN EndoFreeMaxi Kit (QIAGEN, Hilden, Germany). For transposon-mediated gene transfer, 4- to 6-week-old animals received a 25 µg:5 µg ratio of transposon to transposase-encoding plasmid, as previously described [2, 3, 13]. DNA was diluted in saline solution at a final volume of 10% of body weight. The model of transposon-mediated stable intrahepatic transfer of oncogenic *NRAS*<sup>G12V</sup> or *Myc-IRES-NRAS*<sup>G12V</sup> were used to induce HCC development in *p19*<sup>Arf/-</sup> or C57BL/6J mice respectively [1-3, 8]. HCC-Ova was induced in *p19*<sup>Arf/-</sup> mice, as previously described [11].

### **Leukocyte isolation from murine liver tissues and blood**

Single-cell suspensions from the murine livers were prepared as previously described [3, 8, 13]. Briefly, liver tissue was chopped into small ~1 mm<sup>3</sup> pieces and then enzymatically digested in complete DMEM medium (Gibco, USA) supplemented with 5% fetal bovine serum (FBS, Roche, Switzerland), 0.5 mg/ml collagenase D (Roche, Switzerland) and 0.01 mg/ml DNase I (Sigma Aldrich, USA) for 25 min at 37 °C. After incubation, the enzymatic reaction was stopped using 5 mM EDTA and, the liver suspension was passed through a 100 µm cell strainer. Erythrocytes were lysed using an ACK buffer (150 mM NH<sub>4</sub>Cl, 10 mM KHCO<sub>3</sub>, and 0.1 mM EDTA) [3].

Blood was collected from the retro-orbital plexus and mixed with 50 units of heparin (Ratiopharm GmbH, Germany) and erythrocytes were lysed using ACK buffer. The obtained single-cell suspensions were used for stainings and multicolor flow cytometry (FACS) analysis.

### **Cell suspension staining and multicolor FACS analysis**

Isolated single-cell suspensions were stained in 96-well U-bottom plates with fluorochrome-conjugated monoclonal antibodies in FACS buffer (PBS supplemented with 2% FBS, pH=7.4). To avoid Fc-mediated nonspecific interactions, murine cells were pre-incubated with the anti-CD16/32 (clone 93, BioLegend, USA), and human cells were incubated with FcR blocking reagent (BioLegend, USA). Dead cells were excluded based on staining with the Alexa Fluor 350 NHS Ester (Life Technologies, USA). For staining of murine samples, the following monoclonal antibodies were used: anti-B220 (clone RA3-6B2), anti-CD5 (clone 53-7.3), anti-CD1d (clone 1B1), anti-PD-L1 (clone 10F.9G2), anti-IgM (clone RMM-1), anti-CD1d (clone 1B1), anti-IgD (clone 11-26c.2a), anti-CD27 (clone LG.3A10), anti-CD138 (clone 281-2), anti-CD267 (clone 8F10), anti-IL-10 (clone JES5-16E3), anti-CD19 (clone 1D3), anti-IgA (clone 11-44-2).

The antibodies used for the human PBMC staining were the following: anti-CD3 (clone SK7), anti-CD11c (clone 3.9), anti-CD19 (clone HIB19), anti-CD20 (clone 2H7), anti-CD5 (clone L17F12), anti-CD1d (clone 51.1), anti-CD27 (clone M-T271), anti-IgM (clone MHM-88), anti-PD-L1 (clone 29E.2A3), anti-IL-10 (clone JES3-9D7), anti-CD45 (clone HI30), anti-IgD (clone IA6-2). All further information about the antibodies, including the corresponding purchasers, are listed in Table S3.

Samples were acquired on LSR II flow cytometer (BD Biosciences, USA) using BD FACS Diva software (Becton Dickinson Ltd, Oxford, UK) and/or a Cytex Aurora flow cytometer using a SpectroFlo software (Cytex, USA) and analyzed using a FlowJo software (Tree Star, Becton, Dickinson & Company, USA).

### **Histopathological examination**

Murine and resected human liver tissue samples were fixed in 4% paraformaldehyde at room temperature for 24-48 hours, embedded in paraffin, and serially sectioned at 4 µm using a rotary microtome (Microm, Germany). The obtained tissue sections were stained with H&E (Sigma Aldrich, USA and Merck, Germany), argentum (Honeywell-Fluka, USA), and Sirius red (Sigma Aldrich, USA) for the histopathological evaluation, as described [14, 15].

For detection of lipid accumulation in hepatocytes, snap-frozen murine liver tissue samples were sectioned at 6 µm and stained with Oil Red O (Sigma Aldrich, USA), following the routine standard operating procedures at the Institute of Pathology at the MHH [16]. For quantitative morphometry of positive oil area (% Oil Red O) and collagen deposition (% Sirius red) representative images of at least five random fields (100x magnification) were calculated using the ImageJ software.

The immune infiltrates were evaluated at the entire liver tissue on the slide for the presence of lymphocytic immune cells that were scored following the recommendations of Sia D. *et al*

using the scoring from 0 to 4 as follows: 0 (absence of immune cell infiltration), 1 (minimal infiltration), 2 (mild infiltration), 3 (moderate infiltration), and 4 (strong infiltration) [17, 18]. In the present study, we characterized samples as the 'non-inflamed' HCC if the sample's score was between 0 to 2 (minimal to mild immune cell infiltration) and the 'inflamed' HCC, if the immune infiltrate score reached levels 3 and 4 (moderate to strong immune cell infiltration). Liver specimens were analyzed using a standard bright field microscopy (BX51, Olympus (Olympus, Japan) and a Nikon Eclipse Ti2 inverted microscope (Nikon, Japan)). The histopathological analyses were confirmed by two experienced pathologists.

### **Immunohistochemistry (IHC) analysis**

IHC staining was performed on 4 µm-thick formalin-fixed paraffin-embedded tissue sections after heat-induced antigen retrieval in a decloaking chamber (Water Bath 1008, GFL) using citrate buffer (10 mM sodium citrate and 0.05% Tween 20, pH=6.0). Incubation with the primary antibodies to anti-CD19 (1:750, Invitrogen, USA), anti-CD5 (RTU, EpreDia, USA), anti-CD1d (1:1200, antibodies-online, Germany), anti-IgD (1:1000, Abcam, USA), anti-PD-L1 (1:800, Invitrogen, USA), anti-IL-10 (1:500, Invitrogen, USA) was carried out in 5% bovine serum albumin (BSA, Carl Roth, USA) at room temperature for 1 h. Detailed information about all antibodies used for the IHC staining is provided in Table S3. Signal amplification and colour development via diaminobenzidine were performed using EpreDia™ UltraVision™ Quanto Detection System horseradish peroxidase (HRP) DAB (Fisher Scientific, USA) and a counter-staining with Mayer's hematoxylin (Carl Roth, USA).

Images were analyzed using the Nikon Eclipse Ti2 inverted microscope (Nikon, Japan). The quantification of CD19, CD5, CD1d, IgD, PD-L1, and IL-10 positive immune cells was performed using at least five representative fields (100X) and presented as a cellular density (number of positive cells per 1 mm<sup>2</sup>).

### **Immunofluorescent (IF) staining of the frozen liver tissue sections**

Frozen 7 µm-thick liver tissue sections were fixed in ice-cold acetone for 10 min and permeabilized using the 0.1% Triton X-100 (Sigma Aldrich, USA) and 0.1% sodium citrate dihydrate (Fisher Scientific, USA) for 2 minutes at 4°C. Sections were blocked with a PBTB buffer (PBS supplemented with 0.2% Triton X-100 (PBT), 0.2% BSA (Carl Roth, USA), 5% normal goat serum (Abcam, USA) for 30 min at room temperature and incubated, as previously described [8]. Human liver sections were stained with a mix of primary antibodies for 30 min at room temperature: anti-CD19 (clone 6OMP31, Invitrogen, USA), anti-CD5 (clone UCH-T2, Santa Cruz, USA), anti-CD1d (polyclonal, antibodies-online, Germany), anti-IgD (clone EPR6146, Abcam, USA), anti-IgM (clone R1/69, Santa Cruz, USA), anti-IL-10

(polyclonal, Abcam, USA), anti-PD-L1 (polyclonal, Invitrogen, USA). All information about the antibodies, including the corresponding purchasers, are listed in Table S3.

The secondary, fluorescent-conjugated antibodies: Alexa Fluor 488-conjugated donkey anti-rat, Alexa Fluor 555-conjugated donkey anti-rabbit, and Alexa Fluor 647-conjugated donkey anti-mouse antibody (all used at 1:400 dilution, Invitrogen) were applied for 1 h at room temperature. Thereafter, sections were counterstained with 4',6-diamidino-2-phenylindole (DAPI, 0.1 µg/ml, Sigma-Aldrich) in PBS for 10 min at room temperature. Finally, samples were mounted using Citifluor AF1 mountant solution (Electron Microscopy Sciences, Hatfield, PA, USA). Fluorescent images were analyzed using a Zeiss LSM 700 confocal laser-scanning microscope (Carl Zeiss, Germany) (40x objective), ZEN 2011 software and ImageJ software.

## **ELISA**

IgG, IgA, IgM, and IgD levels of antibodies were analyzed in the plasma of mice according to standard ELISA protocols described previously [11]. Briefly, flat-bottomed 96-well ELISA plates were coated overnight with the corresponding antigen dissolved in carbonate buffer. Thereafter, plates were blocked with 3% BSA/PBS and supplied afterwards with murine plasma for 1 hour at 37°C. Detection was performed using anti-mouse IgM-biotin (Sigma Aldrich, USA), anti-mouse IgG-biotin (Sigma Aldrich, USA), or anti-mouse IgA-biotin (Southern Biotech, USA) followed by the incubation with streptavidin-conjugated HRP (BD Pharmingen, USA). HRP substrate solution 2,2'-azino-bis (3-ethylbenzothiazoline-6-sulphonic acid, Sigma Aldrich, USA) was added for the detection of bound IgG/IgM/IgA. Mouse IgD was detected using a sandwich ELISA Kit (CusaBio, USA). Samples were measured at the optical density of 405 nm (OD<sub>405</sub>) using Synergy 2 microplate reader (BioTek, Winooski, Vermont, USA). All samples were examined in triplicates. Software Gen5 was used for the data analysis. All reagents used for ELISA analyses are listed in Table S3.

## **Statistical analysis**

Graph design and statistical analyses were performed using GraphPad Prism 8.3 software (GraphPad Prism, San Diego, USA). The normality of the calculated variables was assessed by using the Kolmogorov–Smirnov test. To compare means, the nonparametric Mann–Whitney *U*-test was used for non-normally distributed data, whereas the unpaired Student's *t* test was applied for normally distributed data. The relationship of variables was analyzed by the unpaired Student's *t* test and Mann–Whitney nonparametric test. If not stated otherwise, the data are shown as mean +/- standard error of the mean (SEM). *P* values < 0.05 were considered statistically significant (\**p* ≤ 0.05, \*\**p* ≤ 0.01, \*\*\**p* ≤ 0.001, and \*\*\*\**p* ≤ 0.001).

## Supplementary figures

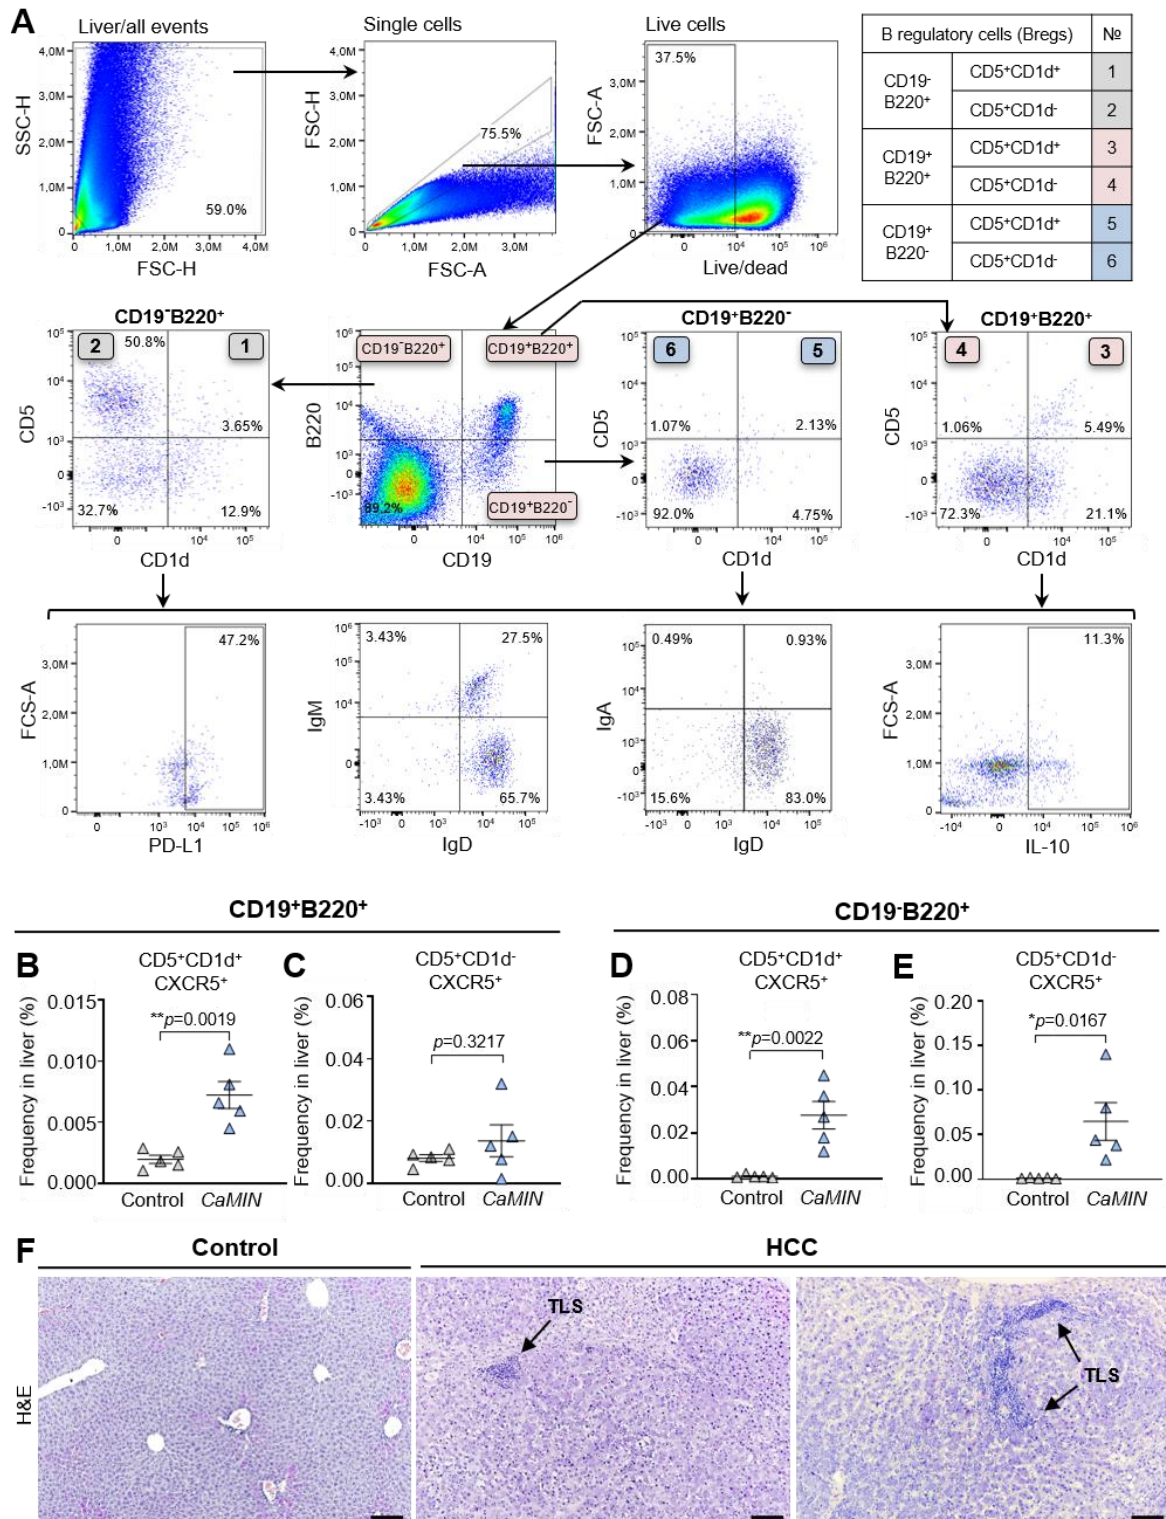

**Fig. S1. Gating strategy to phenotype and characterize Bregs; elevated numbers of CXCR5<sup>+</sup> Bregs and presence of TLS structures in murine HCC. (A)** Gating strategy to define and characterize various populations of Bregs. Single-cell suspensions were obtained from the livers and blood of mice with MASLD, HCC/*NRAS*<sup>G12V</sup>/*p19*<sup>Arf-/-</sup>, and HCC/*CaMIN*.



The cell suspensions were stained and analyzed via the indicated surface and intracellular markers using multicolor FACS. Based on CD19, CD20, CD5, and CD1d markers six distinct populations of Bregs were identified. Further, the immunomodulatory properties of Bregs were assessed while checking PD-L1 and IL-10 expression. In addition, based on IgM, IgD, and IgA expression, several subpopulations of Bregs were defined. **(B-E)** Bregs were further checked for the presence of the homing receptor CXCR5<sup>+</sup> in the livers of HCC/*CaMIN* mice: frequencies of CXCR5<sup>+</sup>-expressing **(B)** CD19<sup>+</sup>B220<sup>+</sup>CD5<sup>+</sup>CD1d<sup>+</sup>, **(C)** CD19<sup>+</sup>B220<sup>+</sup>CD5<sup>+</sup>CD1d<sup>-</sup>, **(D)** CD19<sup>-</sup>B220<sup>+</sup>CD5<sup>+</sup>CD1d<sup>+</sup> and **(E)** CD19<sup>-</sup>B220<sup>+</sup>CD5<sup>+</sup>CD1d<sup>-</sup> Bregs. **(F)** TLS assessment in H&E-stained murine HCC liver (magnification 100x; scale bar, 100 μm). The data were analyzed using the unpaired Student's *t* test. The data are shown as the mean ± SEM, n = 5-6. \**p* < 0.05, \*\**p* < 0.01. Bregs – B regulatory cells, MASLD – metabolic dysfunction-associated steatotic liver disease, TLS – tertiary lymphoid structures.

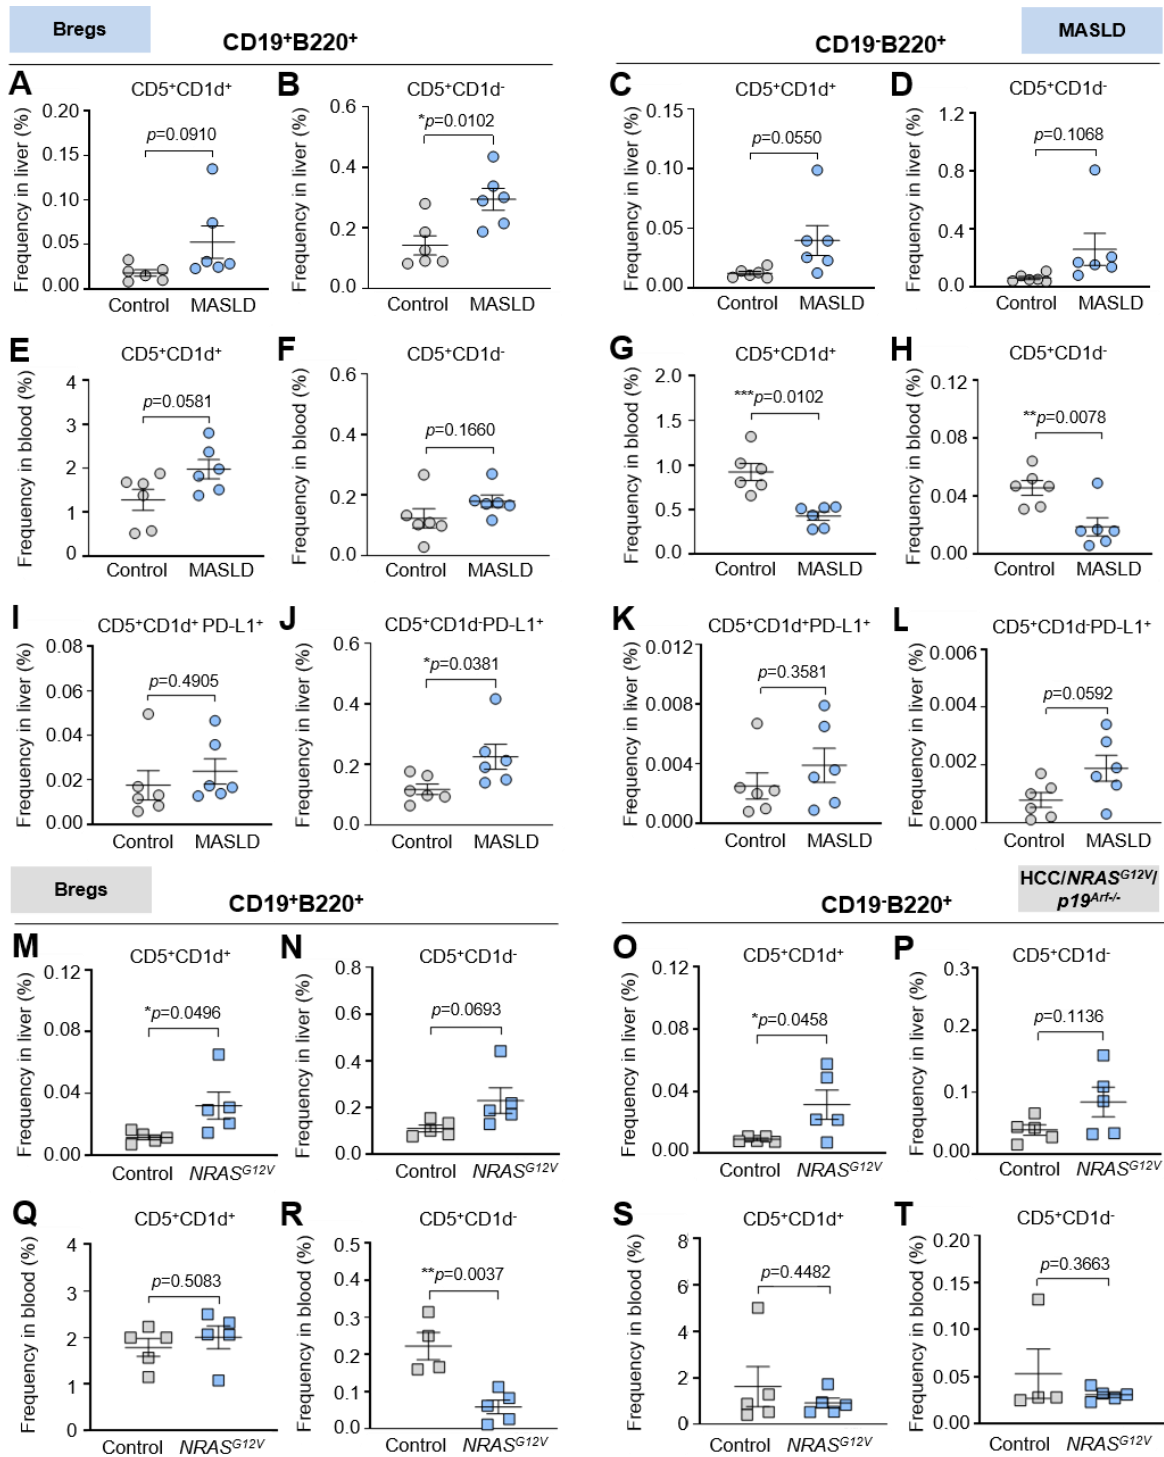

**Fig. S2. Bregs phenotype in MASLD and HCC/*NRAS*<sup>G12V</sup>/*p19*<sup>Arf-/-</sup> mouse models. (A, B)** Frequencies of (A) CD19<sup>+</sup>B220<sup>+</sup>CD5<sup>+</sup>CD1d<sup>+</sup> and (B) CD19<sup>+</sup>B220<sup>+</sup>CD5<sup>+</sup>CD1d<sup>-</sup> B cells in the liver of MASLD mice. (C, D) Frequencies of (C) CD19<sup>-</sup>B220<sup>+</sup>CD5<sup>+</sup>CD1d<sup>+</sup> and (D) CD19<sup>-</sup>B220<sup>+</sup>CD5<sup>+</sup>CD1d<sup>-</sup> B cells in the liver of MASLD mice. (E, H) Frequencies of (E) CD19<sup>+</sup>B220<sup>+</sup>CD5<sup>+</sup>CD1d<sup>+</sup> and (F) CD19<sup>+</sup>B220<sup>+</sup>CD5<sup>+</sup>CD1d<sup>-</sup> B cells in the blood of MASLD mice. (G, H) Frequencies of (G) CD19<sup>-</sup>B220<sup>+</sup>CD5<sup>+</sup>CD1d<sup>+</sup> and (H) CD19<sup>-</sup>B220<sup>+</sup>CD5<sup>+</sup>CD1d<sup>-</sup> B cells in the blood of MASLD mice. (I-L) Frequencies of PD-L1<sup>+</sup>-expressing Bregs in the livers

of MASLD mice. **(M, N)** Frequencies of **(M)** CD19<sup>+</sup>B220<sup>+</sup>CD5<sup>+</sup>CD1d<sup>+</sup> and **(N)** CD19<sup>+</sup>B220<sup>+</sup>CD5<sup>+</sup>CD1d<sup>-</sup> B cells in the liver of HCC/*NRAS*<sup>G12V</sup>/*p19*<sup>Arf-/-</sup> mice. **(O, P)** Frequencies of **(O)** CD19<sup>-</sup>B220<sup>+</sup>CD5<sup>+</sup>CD1d<sup>+</sup> and **(P)** CD19<sup>-</sup>B220<sup>+</sup>CD5<sup>+</sup>CD1d<sup>-</sup> B cells in the liver of HCC/*NRAS*<sup>G12V</sup>/*p19*<sup>Arf-/-</sup> mice. **(Q, R)** Frequencies of **(Q)** CD19<sup>+</sup>B220<sup>+</sup>CD5<sup>+</sup>CD1d<sup>+</sup> and **(R)** CD19<sup>+</sup>B220<sup>+</sup>CD5<sup>+</sup>CD1d<sup>-</sup> B cells in the blood of HCC/*NRAS*<sup>G12V</sup>/*p19*<sup>Arf-/-</sup> mice. **(S, T)** Frequencies of **(S)** CD19<sup>-</sup>B220<sup>+</sup>CD5<sup>+</sup>CD1d<sup>+</sup> and **(T)** CD19<sup>-</sup>B220<sup>+</sup>CD5<sup>+</sup>CD1d<sup>-</sup> B cells in the blood of HCC/*NRAS*<sup>G12V</sup>/*p19*<sup>Arf-/-</sup> mice. The data were analyzed using the unpaired Student's *t* test. The data are shown as the mean ± SEM, n = 5-6. \**p* < 0.05, \*\**p* < 0.01, \*\*\**p* < 0.001. Bregs – B regulatory cells, MASLD – metabolic dysfunction-associated steatotic liver disease.

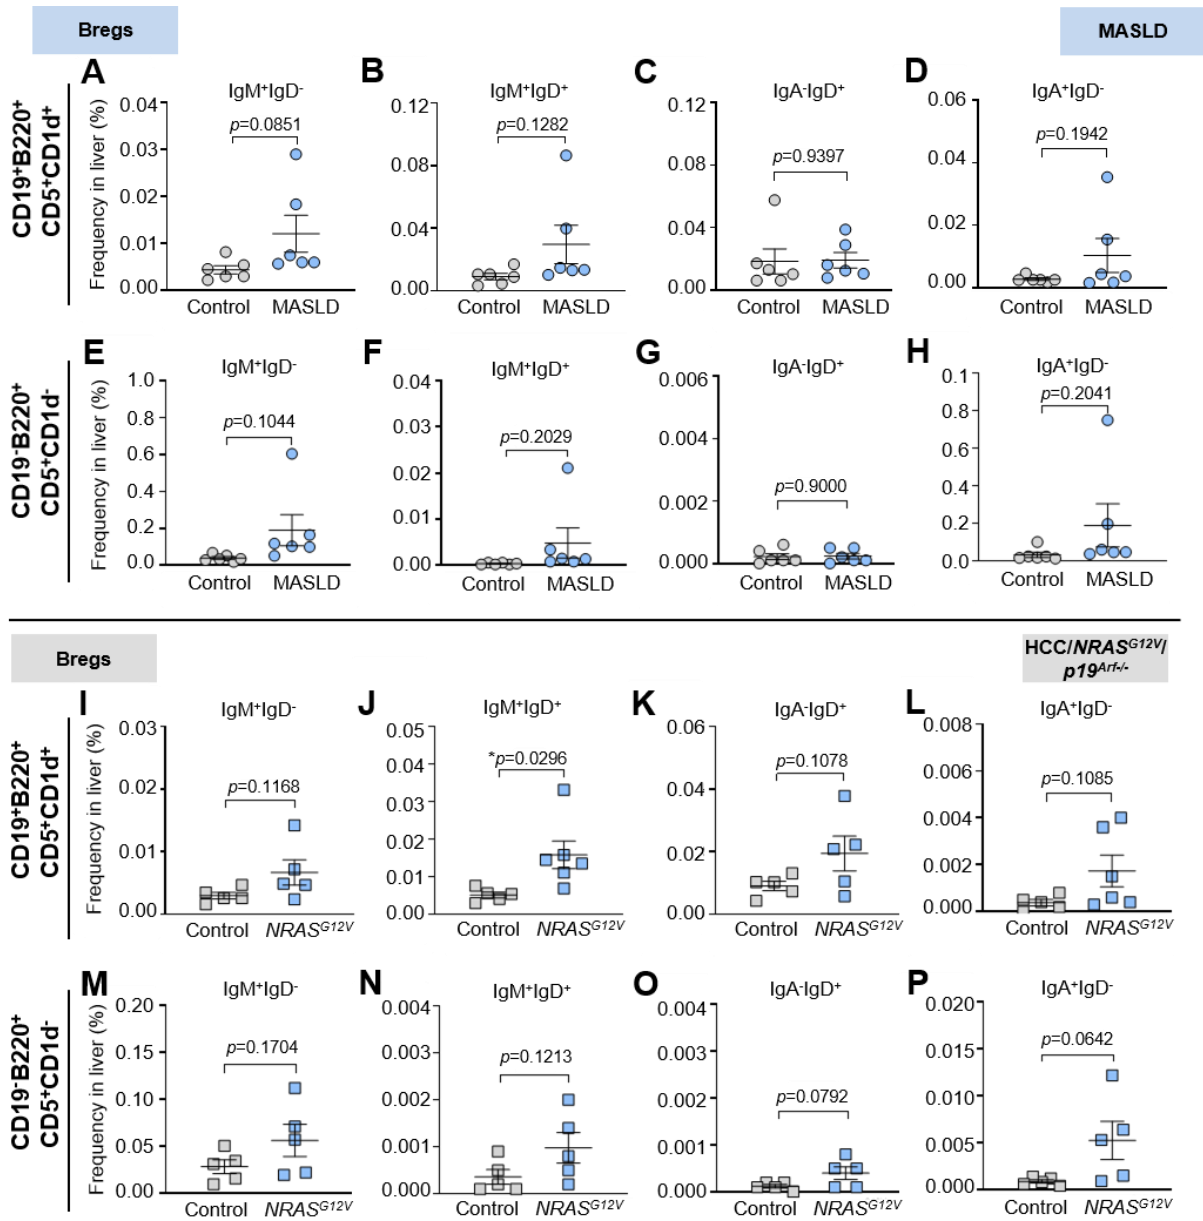

**Fig. S3. IgM<sup>+</sup>, IgD<sup>+</sup>, and IgA<sup>+</sup> Bregs in the livers of MASLD and HCC/NRAS<sup>G12V</sup>/p19<sup>Arf/-</sup> mice.** (A-H), Frequencies of (A, E) IgM<sup>+</sup>IgD<sup>-</sup>, (B, F) IgM<sup>+</sup>IgD<sup>+</sup>, (C, G) IgA<sup>-</sup>IgD<sup>+</sup>, and (D, H) IgA<sup>+</sup>IgD<sup>-</sup>-expressing CD19<sup>+</sup>B220<sup>+</sup>CD5<sup>+</sup>CD1d<sup>-</sup> and CD19<sup>-</sup>B220<sup>+</sup>CD5<sup>+</sup>CD1d<sup>-</sup> Bregs, respectively, in the livers of MASLD mice. (I-P) Frequencies of (I, M) IgM<sup>+</sup>IgD<sup>-</sup>, (J, N) IgM<sup>+</sup>IgD<sup>+</sup>, (K, O) IgA<sup>-</sup>IgD<sup>+</sup>, and (L, P) IgA<sup>+</sup>IgD<sup>-</sup>-expressing CD19<sup>+</sup>B220<sup>+</sup>CD5<sup>+</sup>CD1d<sup>-</sup> and CD19<sup>-</sup>B220<sup>+</sup>CD5<sup>+</sup>CD1d<sup>-</sup> Bregs, respectively, in the livers of HCC/NRAS<sup>G12V</sup>/p19<sup>Arf/-</sup> mice. The data were analyzed using the unpaired Student's *t* test. The data are shown as the mean ± SEM, n = 5-6. \**p* < 0.05. Bregs – B regulatory cells, MASLD – metabolic dysfunction-associated steatotic liver disease.

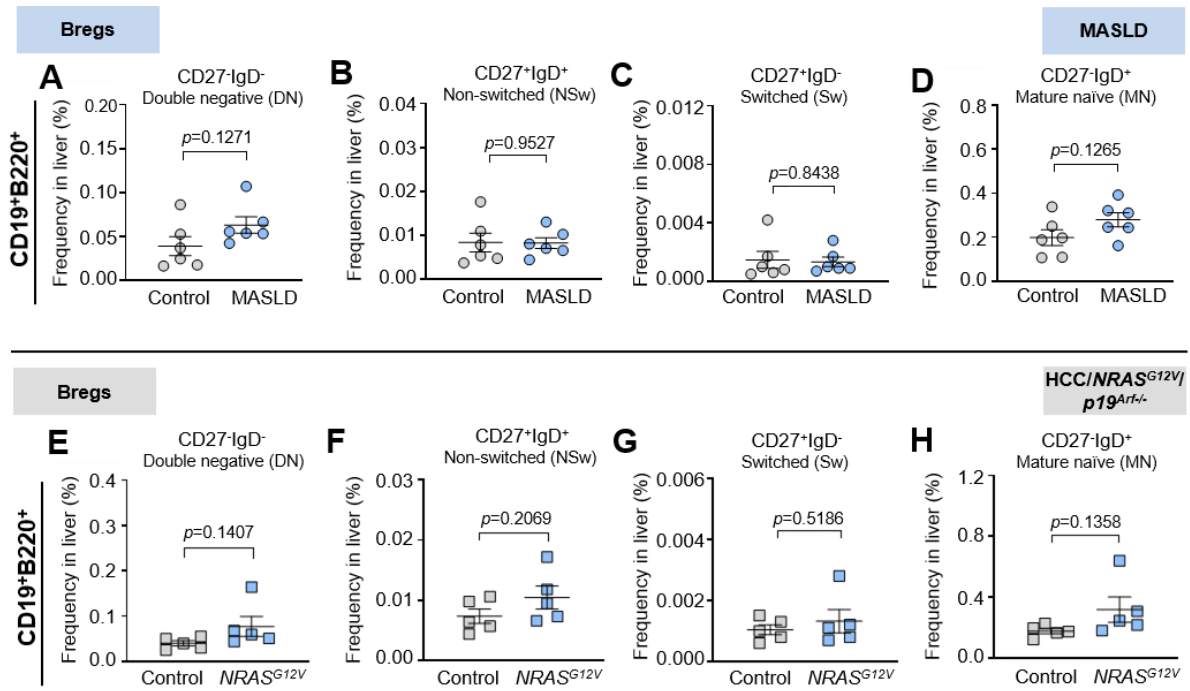

**Fig. S4. MBCs in the livers of MASLD and HCC/NRAS<sup>G12V</sup>/p19<sup>Arf-/-</sup> mice. (A-D)** Frequencies of (A) CD27<sup>-</sup>IgD<sup>-</sup> DN, (B) CD27<sup>+</sup>IgD<sup>+</sup> NSw, (C) CD27<sup>+</sup>IgD<sup>-</sup> Sw, and (D) CD27<sup>-</sup>IgD<sup>+</sup> MN MBCs in the livers and blood of MASLD mice. (E-H) Frequencies of (E) CD27<sup>-</sup>IgD<sup>-</sup> DN, (F) CD27<sup>+</sup>IgD<sup>+</sup> NSw, (G) CD27<sup>+</sup>IgD<sup>-</sup> Sw, and (H) CD27<sup>-</sup>IgD<sup>+</sup> MN MBCs in the livers of HCC/NRAS<sup>G12V</sup>/p19<sup>Arf-/-</sup> mice. The data were analyzed using the unpaired Student's *t* test. The data are shown as the mean ± SEM, n = 5-6. MASLD – metabolic dysfunction-associated steatotic liver disease, MBCs – memory B cells, DN – double negative, NSw – non-switched, Sw – switched, MN – mature naïve.

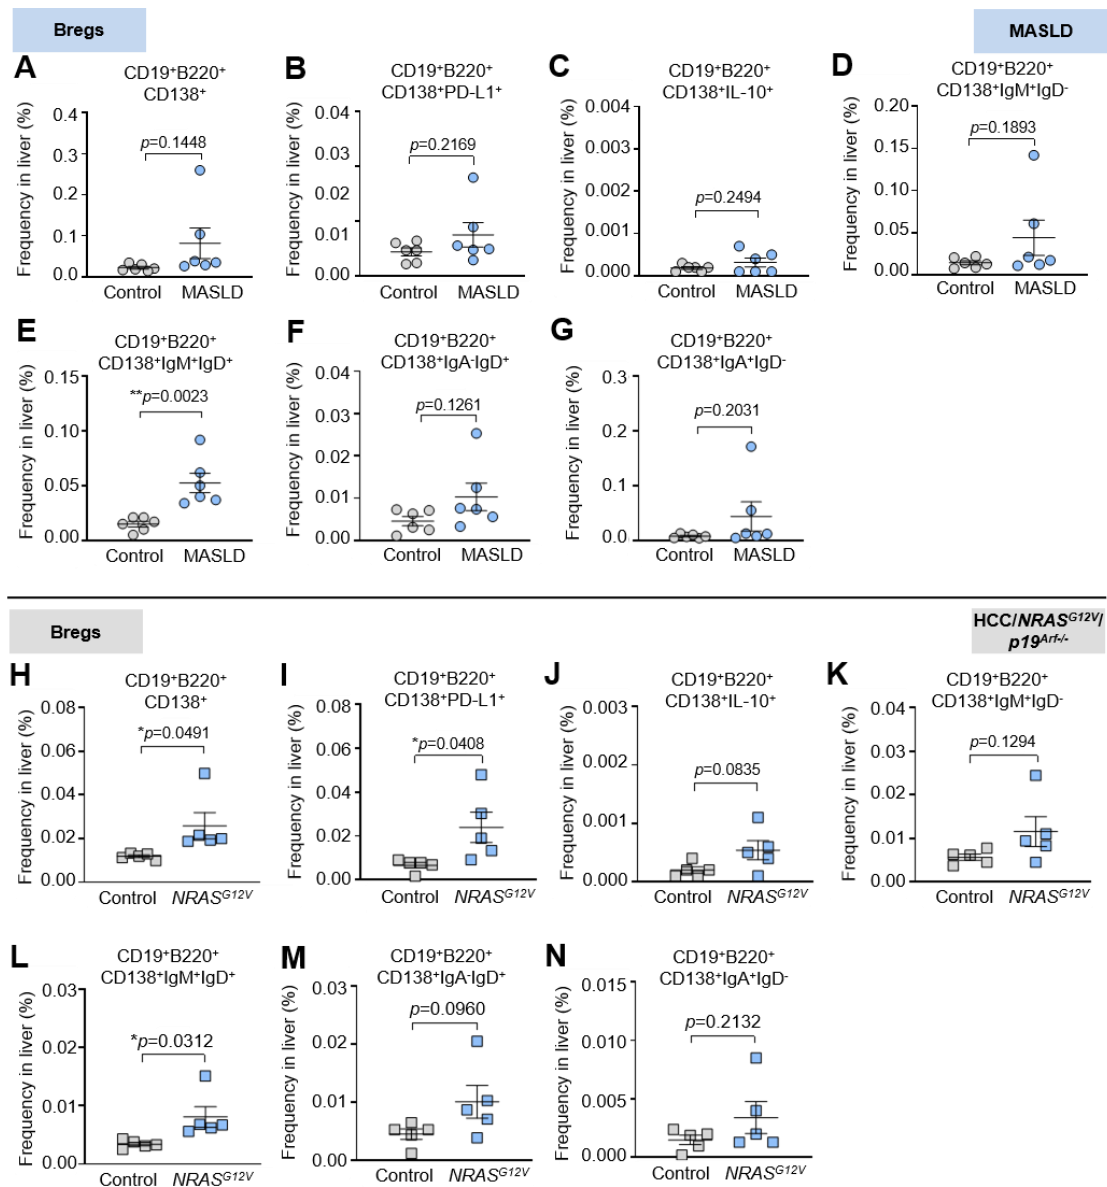

**Fig. S5. Elevated frequencies of PD-L1<sup>+</sup>- and IgM<sup>+</sup>IgD<sup>+</sup>-expressing CD19<sup>+</sup>B220<sup>+</sup>CD138<sup>+</sup> PBs in the livers of MASLD and HCC/NRAS<sup>G12V</sup>/p19<sup>Arf</sup>- mice. (A-C)** Frequencies of (A) CD19<sup>+</sup>B220<sup>+</sup>CD138<sup>+</sup>, (B) CD19<sup>+</sup>B220<sup>+</sup>CD138<sup>+</sup>PD-L1<sup>+</sup>, and (C) CD19<sup>+</sup>B220<sup>+</sup>CD138<sup>+</sup>IL-10<sup>+</sup> B cells in the livers of MASLD mice. (D-G) Frequencies of (D) IgM<sup>+</sup>IgD<sup>-</sup>, (E) IgM<sup>+</sup>IgD<sup>+</sup>, (F), IgA<sup>+</sup>IgD<sup>+</sup>, and (G) IgA<sup>+</sup>IgD<sup>-</sup> CD19<sup>+</sup>B220<sup>+</sup>CD138<sup>+</sup> B cells in the livers of MASLD mice. (H-F) Frequencies of (H) CD19<sup>+</sup>B220<sup>+</sup>CD138<sup>+</sup>, (I) CD19<sup>+</sup>B220<sup>+</sup>CD138<sup>+</sup>PD-L1<sup>+</sup>, and (J) CD19<sup>+</sup>B220<sup>+</sup>CD138<sup>+</sup>IL-10<sup>+</sup> B cells in the livers of HCC/NRAS<sup>G12V</sup>/p19<sup>Arf</sup>- mice. (K-N) Frequencies of (K) IgM<sup>+</sup>IgD<sup>-</sup>, (L) IgM<sup>+</sup>IgD<sup>+</sup>, (M), IgA<sup>+</sup>IgD<sup>+</sup>, and (N) IgA<sup>+</sup>IgD<sup>-</sup> CD19<sup>+</sup>B220<sup>+</sup>CD138<sup>+</sup> B cells in the livers of HCC/NRAS<sup>G12V</sup>/p19<sup>Arf</sup>- mice. The data were analyzed using the unpaired Student's *t* test. The data are shown as the mean  $\pm$  SEM,  $n = 5-6$ . \* $p < 0.05$ , \*\* $p < 0.01$ . Bregs – B regulatory cells, MASLD – metabolic dysfunction-associated steatotic liver disease, PBs – plasmablasts.

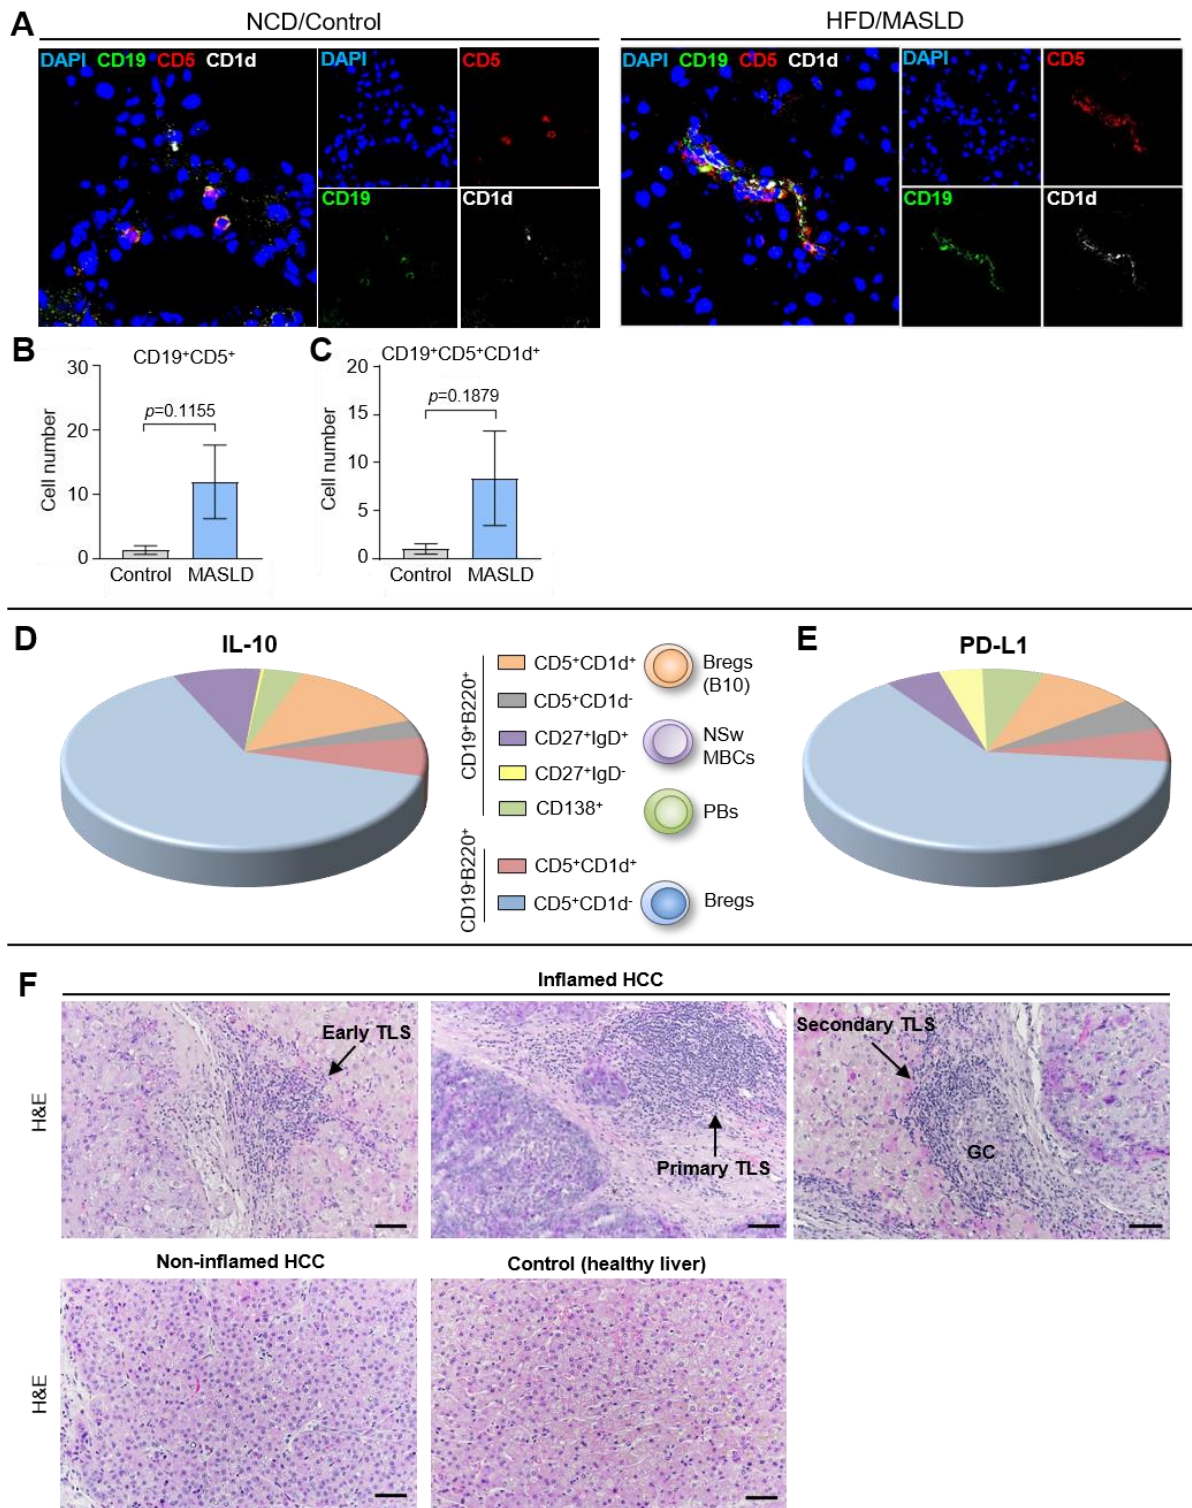

**Fig. S6.** An increase in the numbers of CD19<sup>+</sup>CD5<sup>+</sup>, CD19<sup>+</sup>CD5<sup>+</sup>CD1d<sup>+</sup> Breg cells in murine MASLD; comparison of B cell subsets based on IL-10 and PD-L1 expression in murine HCC/*CaMIN*; TLS structures in murine HCC. (A) Representative IF images on frozen liver sections were obtained from MASLD mice stained with CD19 (green), CD5 (red), and CD1d (white) antibodies and counterstained with DAPI (blue). (B-C) Quantification of (B) CD19<sup>+</sup>CD5<sup>+</sup>, and (C) CD19<sup>+</sup>CD5<sup>+</sup>CD1d<sup>+</sup> cells in the livers obtained from MASLD mice. (D-E)

Pie charts demonstrating the proportions of **(D)** IL-10<sup>+</sup>, and **(E)** PD-L1<sup>+</sup> B cell populations in the livers of mice with HCC/*CaMIN*. **(F)** TLS detection in H&E-stained human HCC, demonstrating early, primary, and secondary TLS types and the presence of a germinal center in the inflamed HCC tissue. Controls: non-inflamed HCC (on the left) and healthy liver tissue (on the right). Magnification 400x; scale bar, 100  $\mu$ m. The data were analyzed using the unpaired Student's *t* test. The data are shown as the mean  $\pm$  SEM, n = 5-6. NCD – normal chow diet, HFD – high-fat diet, NSw MBC – non-switched memory B cell, Breg – B regulatory cell, PB – plasmablast, TLS – tertiary lymphoid structures, GC – germinal center, MASLD – metabolic dysfunction-associated steatotic liver disease.



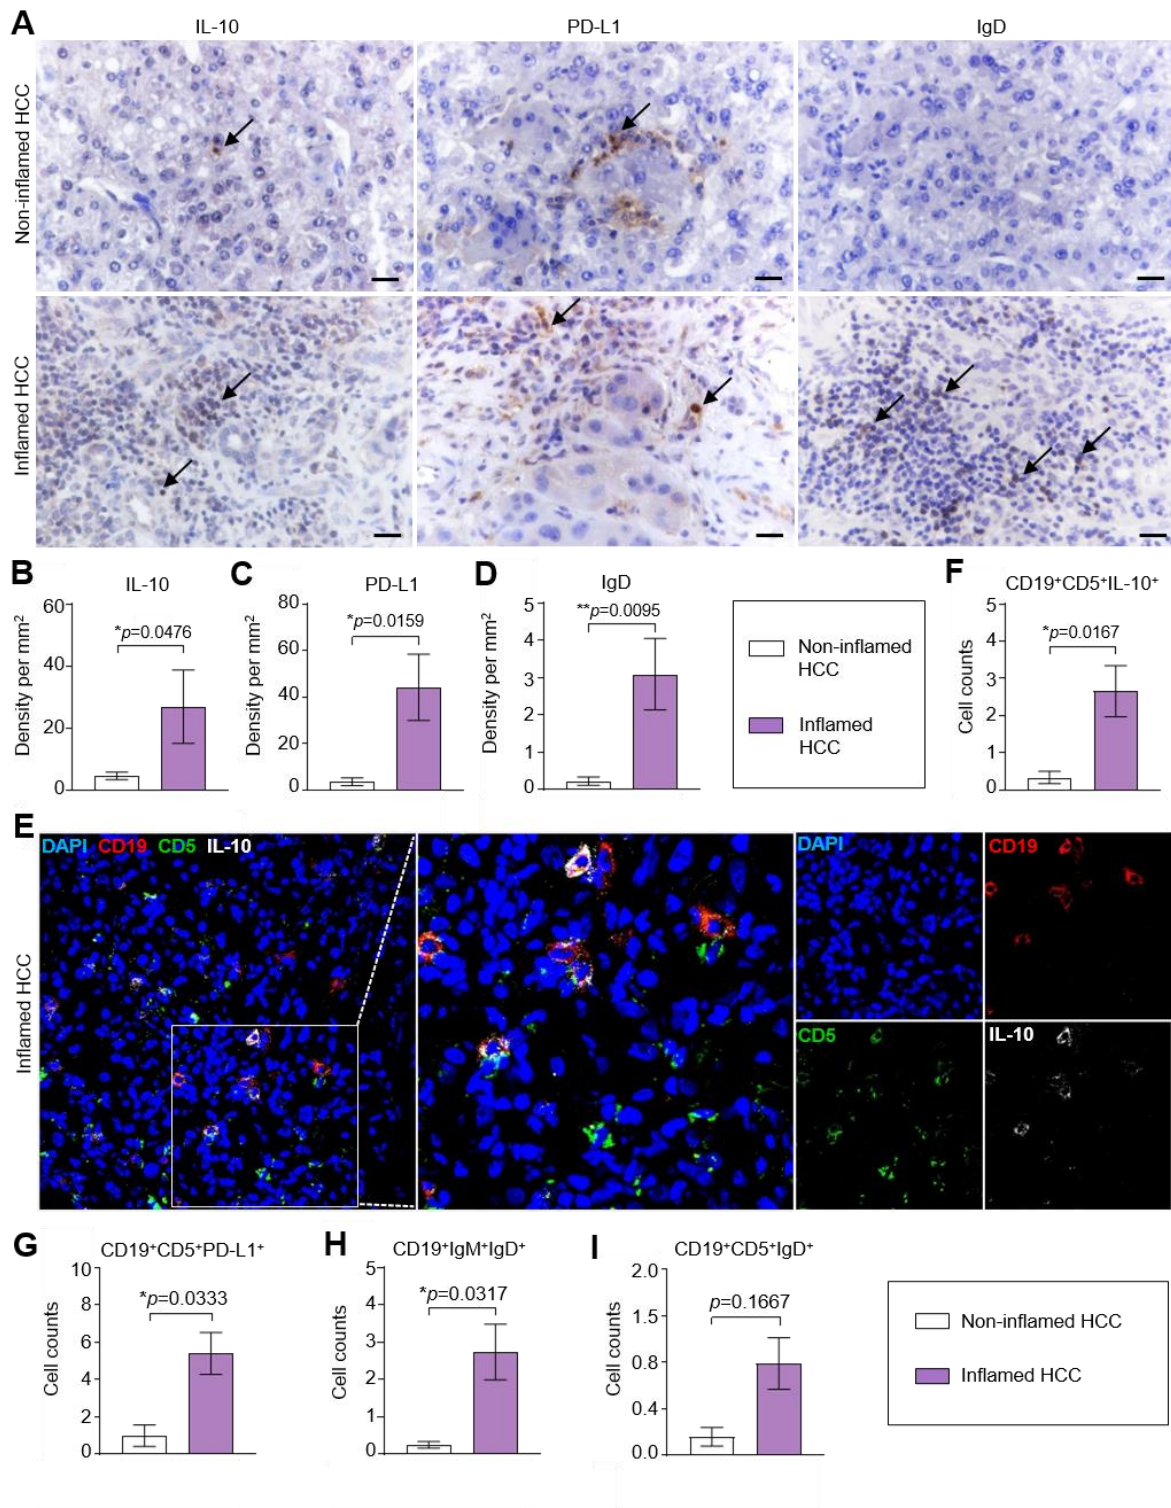

**Fig. S7. The inflamed subtype of human HCC is characterized by the increased numbers of CD19<sup>+</sup>CD5<sup>+</sup>IL-10<sup>+</sup>, CD19<sup>+</sup>CD5<sup>+</sup>PD-L1<sup>+</sup>, and CD19<sup>+</sup>IgM<sup>+</sup>IgD<sup>+</sup> B cells. (A)** Representative images of IHC of IL-10, PD-L1, and IgD expression in the non-inflamed and inflamed human HCC tissues. Scale bar, 100  $\mu$ m. **(B-D)** Density of cellular markers **(B)** IL-10, **(C)** PD-L1, and **(D)** IgD in the non-inflamed and inflamed human HCC tissues. The data were analyzed using the Mann–Whitney nonparametric test, *n*=10. \**p* < 0.05, \*\**p* < 0.01. **(E)** Representative IF images on frozen liver sections from patients with inflamed HCC stained

with CD19 (red), CD5 (green), and IL-10 (white) antibodies and counterstained with DAPI (blue). **(F-I)** Quantification of **(G)** CD19<sup>+</sup>CD5<sup>+</sup>IL-10<sup>+</sup>, **(G)** CD19<sup>+</sup>CD5<sup>+</sup>PD-L1<sup>+</sup>, **(H)** CD19<sup>+</sup>IgM<sup>+</sup>IgD<sup>+</sup>, and **(I)** CD19<sup>+</sup>CD5<sup>+</sup>IgD<sup>+</sup> cells in the non-inflamed and inflamed human HCC tissues. The data were analyzed using the Mann–Whitney nonparametric test, n=7. \**p* < 0.05.

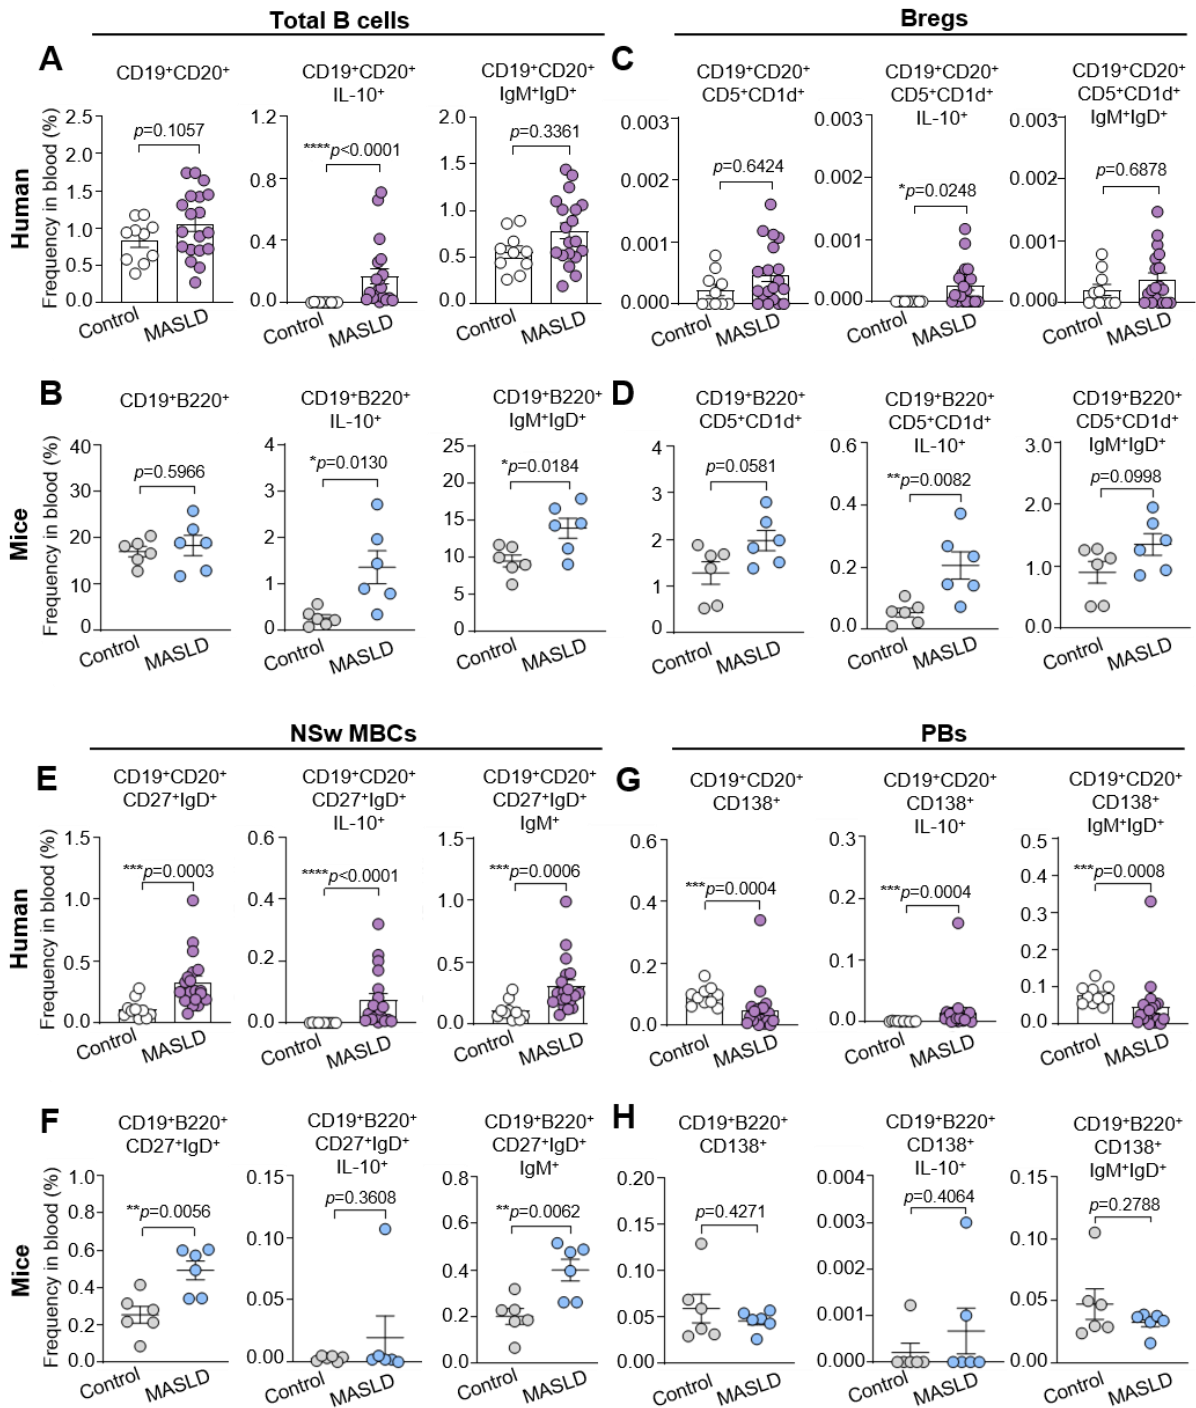

**Fig. S8. B cell phenotyping in the blood of patients with MASLD revealed a strong increase of IL-10 on total CD19<sup>+</sup>CD20<sup>+</sup> B cells, on CD19<sup>+</sup>CD20<sup>+</sup>CD5<sup>+</sup>CD1d<sup>+</sup> Bregs and on CD19<sup>+</sup>CD20<sup>+</sup>CD27<sup>+</sup>IgD<sup>+</sup> NSw MBCs. The data strongly correlated between mice and humans with MASLD. (A, B) Frequencies of total B cells in the blood of (A) patients and (B) mice with MASLD. (C, D) Frequencies of Bregs in the blood of (C) patients and (D) mice with MASLD. (E, F) Frequencies of NSw MBCs in the blood of (E) patients and (F) mice with MASLD. (G, H) Frequencies of PBs in the blood of (G) patients and (H) mice with MASLD. The data were analyzed using the Mann–Whitney nonparametric test,  $n=4$ .  $*p < 0.05$ ,  $**p < 0.01$ ,  $***p < 0.001$ ,  $****p < 0.0001$ .**

0.01, \*\*\* $p < 0.001$ , \*\*\*\* $p < 0.0001$ . Bregs – B regulatory cells, NSw MBCs – non-switched memory B cells, PBs – plasmablasts. MASLD – metabolic dysfunction-associated steatotic liver disease.

**Graphical abstract. Essential roles of IgM<sup>+</sup>IgD<sup>+</sup> Bregs, NSw MBCs and PBs in the progression of MASLD and HCC.**

Murine models were used to clarify the phenotypic characteristics and investigate the role of B lymphocytes in precancerous (MASLD) and cancerous (HCC) liver diseases. The results obtained in mice have also been verified in patients with MASLD and HCC. Blood and liver tissues obtained from mice and patients were analyzed using multicolor FACS, ELISA, IHC and IF. Our study revealed an increase in numbers of several specific B cell subsets: 1) CD19<sup>+</sup>B220<sup>+</sup>CD5<sup>+</sup>CD1d<sup>+</sup> B10 Bregs; 2) CD19<sup>+</sup>B220<sup>+</sup>CD5<sup>+</sup>CD1d<sup>-</sup> Bregs; 3) CD19<sup>+</sup>B220<sup>+</sup>CD5<sup>-</sup>CD27<sup>+</sup> NSw MBCs; and 4) CD19<sup>+</sup>B220<sup>+</sup>CD138<sup>+</sup> PBs, all of which highly expressed IgM, IgD receptors, and the inhibitory molecules PD-L1 and IL-10. Two pie chart diagrams, demonstrating the proportions of IL-10<sup>+</sup>- and PD-L1<sup>+</sup>-expressing B cell subsets in the livers of HCC/*CaMIN* mice and depicting the most immunosuppressive B cell subset, CD19<sup>+</sup>B220<sup>+</sup>CD5<sup>+</sup>CD1d<sup>-</sup> Bregs, in murine HCC. All four identified B cell subsets might play a protumorigenic role in precancerous (MASLD) and cancerous (HCC) liver disease progression.

## Supplementary tables

**Table S1. Clinicopathological characteristics of the human cohort with HCC (n=16).**

| <b>Age (years)</b>                   |               |
|--------------------------------------|---------------|
| Median (range)                       | 69.08 (50-82) |
| <b>Gender, n (%)</b>                 |               |
| Male                                 | 11 (68.75%)   |
| Female                               | 5 (31.25%)    |
| <b>BMI</b>                           |               |
| <25                                  | 5 (31.25%)    |
| ≥25                                  | 9 (56.25%)    |
| Unknown                              | 2 (12.50%)    |
| <b>AFP, n (%)</b>                    |               |
| <20 ng/ml                            | 8 (50.00%)    |
| ≥20 ng/ml                            | 3 (18.75%)    |
| Unknown                              | 5 (31.25%)    |
| <b>GGT, n (%)</b>                    |               |
| <54 U/L                              | 7 (43.75%)    |
| 8 (50.00%)                           | 8 (50.00%)    |
| Unknown                              | 1 (6.25%)     |
| <b>Microvascular invasion, n (%)</b> |               |
| Yes                                  | 3 (18.75%)    |
| No                                   | 13 (81.25%)   |
| <b>Inflammatory type</b>             |               |
| Inflamed                             | 8 (50.00%)    |
| Non-inflamed                         | 8 (50.00%)    |
| <b>Tumor stage, TNM, n (%)</b>       |               |
| 1                                    | 6 (37.50%)    |
| 2                                    | 4 (25.00%)    |
| 3                                    | 1 (6.25%)     |
| 4                                    | 1 (6.25%)     |
| Unknown                              | 4 (25.00%)    |
| <b>Tumor grade, n (%)</b>            |               |

|         |             |
|---------|-------------|
| I       | 0           |
| II      | 12 (75.00%) |
| III     | 1 (6.25%)   |
| Unknown | 3 (18.75%)  |

BMI – body mass index; AFP – alpha-1-fetoprotein; GGT – gamma-glutamyltransferase; TNM – tumor, nodes, metastasis.

**Table S2. Clinical characteristics of the human cohort with MASLD (n=19).**

|                      |             |
|----------------------|-------------|
| <b>Age (years)</b>   |             |
| Median (range)       | 48 (32-74)  |
| <b>Gender, n (%)</b> |             |
| Male                 | 14 (73.68%) |
| Female               | 5 (26.32%)  |
| <b>BMI</b>           |             |
| <25                  | 18 (94.73%) |
| ≥25                  | 1 (5.26%)   |
| <b>AFP, n (%)</b>    |             |
| <20 ng/ml            | 0 (0%)      |
| ≥20 ng/ml            | 19 (100%)   |
| <b>GGT, n (%)</b>    |             |
| <54 U/L              | 11 (57.89%) |
| ≥54 U/L              | 8 (42.10%)  |

BMI – body mass index; AFP – alpha-1-fetoprotein; GGT – gamma-glutamyltransferase.

**Table S3. Key resources table.**

| Reagent or resource                       | Source        | Identifier                         |
|-------------------------------------------|---------------|------------------------------------|
| <b>Antibodies used for flow cytometry</b> |               |                                    |
| Anti-mouse B220                           | BioLegend     | Cat # 103236;<br>RRID: AB_893354   |
| Anti-mouse CD5                            | BioLegend     | Cat # 100622;<br>RRID: AB_2562773  |
| Anti-mouse CD1d                           | BioLegend     | Cat # 123520;<br>RRID: AB_2715918  |
| Anti-mouse PD-L1                          | BioLegend     | Cat # 124343;<br>RRID: AB_2894674  |
| Anti-mouse IgM                            | BioLegend     | Cat # 406504;<br>RRID: AB_315054   |
| Anti-mouse IgD                            | BioLegend     | Cat # 405704;<br>RRID: AB_315026   |
| Anti-mouse CD27                           | BioLegend     | Cat # 124233;<br>RRID: AB_2687192  |
| Anti-mouse CD138                          | BioLegend     | Cat # 142515;<br>RRID: AB_2562336  |
| Anti-mouse CD267                          | BioLegend     | Cat # 133404;<br>RRID: AB_2240584  |
| Anti-mouse IL-10                          | BioLegend     | Cat # 505022;<br>RRID: AB_2563240  |
| Anti-mouse CD19                           | BD Bioscience | Cat # 563157;<br>RRID: AB_2738035  |
| Anti-mouse IgA                            | eBioscience   | Cat # 13599482;<br>RRID: AB_466863 |
| Anti-mouse CD20                           | BioLegend     | Cat # 152104;<br>RRID: AB_2629619  |
| Anti-human CD3                            | BioLegend     | Cat # 344846;<br>RRID: AB_2800923  |
| Anti-human CD11c                          | BioLegend     | Cat # 301626;<br>RRID: AB_10662381 |
| Anti-human CD19                           | BioLegend     | Cat # 302270;<br>RRID: AB_2832581  |
| Anti-human CD20                           | BioLegend     | Cat # 302332;<br>RRID: AB_2563805  |
| Anti-human CD5                            | BioLegend     | Cat # 364020;<br>RRID: AB_2565941  |
| Anti-human CD1d                           | BioLegend     | Cat # 350316;<br>RRID: AB_2687379  |
| Anti-human CD38                           | BioLegend     | Cat # 303550;<br>RRID: AB_2860784  |
| Anti-human CD27                           | BioLegend     | Cat # 356428;<br>RRID: AB_261671   |
| Anti-human IgM                            | BioLegend     | Cat # 314544;                      |

|                                                     |                          |                                       |
|-----------------------------------------------------|--------------------------|---------------------------------------|
|                                                     |                          | RRID: AB_2800832                      |
| Anti-human PD-L1                                    | BioLegend                | Cat # 329718;<br>RRID: AB_2561687     |
| Anti-human IL-10                                    | BioLegend                | Cat # 501426;<br>RRID: AB_2566744     |
| Anti-human CD45                                     | BD Biosciences           | Cat # 563792;<br>RRID: AB_2869519     |
| Anti-human CD24                                     | BD Biosciences           | Cat # 741831;<br>RRID: AB_2871166     |
| Anti-human IgD                                      | BD Biosciences           | Cat # 566138;<br>RRID: AB_2739536     |
| TruStain FcX™ (anti-mouse CD16/32) antibody         | BioLegend                | Cat # 101320;<br>RRID: AB_1574975     |
| Human TruStain FcX™ (Fc Receptor Blocking Solution) | BioLegend                | Cat # 422302;<br>RRID: AB_2818986     |
| BV785 Streptavidin                                  | BioLegend                | Cat # 405249; RRID: N/A               |
| APC-Cy7 Streptavidin                                | BioLegend                | Cat # 405208; RRID: N/A               |
| <b>Antibodies used for IHC and IF</b>               |                          |                                       |
| Anti-CD19                                           | Invitrogen               | Cat # PA5-27442;<br>RRID: AB_2544918  |
| Anti-CD19                                           | eBioscience™             | Cat # 14019482;<br>RRID: AB_2637171   |
| Anti-CD19                                           | eBioscience™             | Cat # 53-0194-82;<br>RRID: AB_2637167 |
| Anti-CD5                                            | Epredia™ Lab Vision™     | Cat # MS-393-R7;<br>RRID: AB_61248    |
| Anti-CD5                                            | Invitrogen               | Cat # MA5-17781;<br>RRID: AB_2539165  |
| Anti-CD5                                            | Santa Cruz Animal Health | Cat # sc-1180;<br>RRID: AB_627112     |
| Anti-CD1d                                           | antibodies-online.com    | Cat # ABIN3022497;<br>RRID: N/A       |
| Anti-IL-10                                          | Invitrogen               | Cat # PA5-85660;<br>RRID: AB_2792799  |
| Anti-PD-L1                                          | Invitrogen               | Cat # PA5-28115;<br>RRID: AB_2545591  |
| Anti-IgD                                            | Abcam                    | Cat # AB124795;<br>RRID: AB_10974228  |
| Anti-IgM                                            | Santa Cruz Animal Health | Cat # sc-53347;<br>RRID: AB_672096    |
| Donkey anti-rat IgG, Alexa Fluor 647                | Invitrogen               | Cat # A-78947;<br>RRID: AB_2910635    |
| Donkey anti-rabbit IgG, Alexa Fluor 555             | Invitrogen               | Cat # A-31572;<br>RRID: AB_162543     |
| Donkey anti-mouse IgG, Alexa Fluor 488              | Invitrogen               | Cat # A-21202;<br>RRID: AB_141607     |



|                                                      |                                        |                                    |
|------------------------------------------------------|----------------------------------------|------------------------------------|
| Goat anti-mouse IgG1,<br>Alexa Fluor 488             | Invitrogen                             | Cat # A-21121;<br>RRID: AB_2535764 |
| Goat anti-rat IgG,<br>Alexa Fluor 568                | Invitrogen                             | Cat # A-11077;<br>RRID: AB_2534121 |
| Goat anti-rabbit IgG,<br>Alexa Fluor 647             | Invitrogen                             | Cat # A-21245;<br>RRID: AB_2535813 |
| <b>Antibodies used for B-cell depletion</b>          |                                        |                                    |
| Anti-mouse CD20                                      | BioLegend                              | Cat # 152116;<br>RRID: AB_2629619  |
| <b>Chemicals, peptides and recombinant proteins</b>  |                                        |                                    |
| Complete DMEM (cDMEM)<br>medium                      | Gibco                                  | Cat # 31966021                     |
| Complete RPMI 1640 (cRPMI)<br>medium                 | Gibco                                  | Cat # 72400047                     |
| Fetal bovine serum (FBS)                             | Serena                                 | Cat # S-FBSP-EU-015                |
| Penicillin/Streptomycin                              | Gibco                                  | Cat # 15070063                     |
| Collagenase D                                        | Roche                                  | Cat # 11088882001                  |
| DNase I                                              | Sigma Aldrich                          | Cat # D4527                        |
| EDTA                                                 | Carl Roth                              | Cat # 8043.2                       |
| Heparin 5000                                         | Ratiopharm                             | Cat # PZN-03029820                 |
| Ammonium chloride (NH <sub>4</sub> Cl)               | Carl Roth                              | Cat # P726.2                       |
| Potassium hydrogen carbonate<br>(KHCO <sub>3</sub> ) | Carl Roth                              | Cat # X887.2                       |
| Phosphate buffered saline (PBS)                      | Gibco                                  | Cat # 70013-016                    |
| Ficoll-Paque PLUS                                    | GE Healthcare                          | Cat # GE17-1440-02                 |
| Trypan blue                                          | Sigma Aldrich                          | Cat # T815                         |
| Alexa Fluor™ 350 NHS Ester<br>(Succinimidyl Ester)   | Life Technologies<br>(Molecular Probe) | Cat # 11579036                     |
| Argentum                                             | Honeywell-Fluka                        | Cat # 31630-2506                   |
| Eosin                                                | Merck                                  | Cat # 1.115935-0100                |
| Hematoxylin                                          | Sigma Aldrich                          | Cat # 517-28-2                     |
| Sirius red (Direct Red 80)                           | Sigma Aldrich                          | Cat # 2610-10-8                    |
| Oil red O                                            | Sigma Aldrich                          | Cat # O-0625                       |
| DAPI (4',6-diamidino-2-<br>phenylindole)             | Sigma-Aldrich                          | Cat # D9542-50MG                   |
| Normal goat serum                                    | Abcam                                  | Cat # ab7481                       |
| Bovine serum albumin fraction V                      | Carl Roth                              | Cat # 8076.4                       |
| Triton X-100                                         | Sigma Aldrich                          | Cat # 9002-93-1                    |

|                                                                   |                    |                                               |
|-------------------------------------------------------------------|--------------------|-----------------------------------------------|
| Sodium citrate dihydrate                                          | Fisher Scientific  | Cat # 11945071                                |
| <b>Commercial kits / assays</b>                                   |                    |                                               |
| QIAGEN EndoFree Maxi Kit                                          | Qiagen             | Cat # 12362                                   |
| Mouse Immunoglobulin D (IgD) ELISA Kit                            | CusaBio            | Cat # CSB-E15761m                             |
| Epredia™ UltraVision™ Quanto Detection System HRP DAB             | Fisher Scientific  | Cat # 12673997                                |
| <b>Experimental models: animals / murine strains</b>              |                    |                                               |
| C57BL/6J                                                          | Charles River      | Strain code: 632;<br>RRID: IMSR_JAX:000664    |
| B6.129X1-Cdkn2a <sup>tm1Cjs</sup> ( <i>p19<sup>Arf</sup>-/-</i> ) | Jackson Laboratory | Strain code: 029676;<br>RRID: IMSR_JAX:029676 |
| B6.129S2-Igh-6 <sup>tm1Cgn/J</sup> (μMT)                          | Jackson Laboratory | Strain Code: 002288;<br>RRID: IMSR_JAX:002288 |
| B6.129P2-Igh-J <sup>tm1Cgn/J</sup> (JHT)                          | Jackson Laboratory | Strain Code: 002438;<br>RRID: IMSR_JAX:002438 |
| <b>Software and algorithms</b>                                    |                    |                                               |
| FlowJo, v10.8.1                                                   | Tree Star Inc.     | RRID: SCR_008520                              |
| GraphPad Prism, v8.3                                              | GraphPad Software  | RRID: SCR_002798                              |
| ZEN Digital Imaging for Light Microscopy, 2011                    | Carl Zeiss AG      | RRID: SCR_013672                              |
| Fiji/ImageJ                                                       | Fiji               | RRID: SCR_002285                              |
| Adobe Photoshop CS5                                               | Adobe              | RRID: SCR_014199                              |
| <b>Other</b>                                                      |                    |                                               |
| Instrument: Cytex Aurora                                          | Cytex              |                                               |
| Instrument: LSR II                                                | BD Biosciences     |                                               |
| Instrument: LUNA-FL™ Automated Fluorescence Cell Counter          | Logos Biosystems   |                                               |
| Instrument: Microtome HM 335 E                                    | Microm             |                                               |
| Instrument: Cryotome HM 500 OM                                    | Microm             |                                               |
| Instrument: Zeiss LSM 700 confocal laser-scanning microscope      | Carl Zeiss AG      |                                               |
| Instrument: BX51, Olympus                                         | Olympus            |                                               |
| Nikon Eclipse Ti2 Inverted Microscope                             | Nikon              |                                               |

## **Supplementary references**

*Author names in bold designate shared co-first authorship.*

- [1] Kamijo T, Zindy F, Roussel MF, et al. Tumor suppression at the mouse INK4a locus mediated by the alternative reading frame product p19ARF. *Cell* 1997;91:649-659.
- [2] Dauch D, Rudalska R, Cossa G, et al. A MYC-aurora kinase A protein complex represents an actionable drug target in p53-altered liver cancer. *Nature medicine* 2016;22:744-753.
- [3] **Kang TW, Yevsa T**, Woller N, et al. Senescence surveillance of pre-malignant hepatocytes limits liver cancer development. *Nature* 2011;479:547-551.
- [4] Kitamura D, Roes J, Kuhn R, et al. B cell-deficient mouse by targeted disruption of the membrane exon of the immunoglobulin mu chain gene. *Nature* 1991;350:423-426.
- [5] Gu H, Zou YR, Rajewsky K. Independent control of immunoglobulin switch recombination at individual switch regions evidenced through Cre-loxP-mediated gene targeting. *Cell* 1993;73:1155-1164.
- [6] Ohashi T, Nakade Y, Ibusuki M, et al. Conophylline inhibits high fat diet-induced non-alcoholic fatty liver disease in mice. *PloS one* 2019;14:e0210068.
- [7] **Bartolome F, Antequera D, de la Cueva M**, et al. Endothelial-specific deficiency of megalin in the brain protects mice against high-fat diet challenge. *Journal of neuroinflammation* 2020;17:22.
- [8] **Petriv N, Neubert L**, Vatashchuk M, et al. Increase of alpha-dicarbonyls in liver and receptor for advanced glycation end products on immune cells are linked to nonalcoholic fatty liver disease and liver cancer. *Oncoimmunology* 2021;10:1874159.
- [9] Shalapour S, Lin XJ, Bastian IN, et al. Inflammation-induced IgA+ cells dismantle anti-liver cancer immunity. *Nature* 2017;551:340-345.
- [10] DiLillo DJ, Hamaguchi Y, Ueda Y, et al. Maintenance of long-lived plasma cells and serological memory despite mature and memory B cell depletion during CD20 immunotherapy in mice. *J Immunol* 2008;180:361-371.
- [11] **Hochnadel I, Hoenicke L**, Petriv N, et al. Safety and efficacy of prophylactic and therapeutic vaccine based on live-attenuated *Listeria monocytogenes* in hepatobiliary cancers. *Oncogene* 2022.
- [12] **Rudalska R, Dauch D**, Longerich T, et al. In vivo RNAi screening identifies a mechanism of sorafenib resistance in liver cancer. *Nature medicine* 2014;20:1138-1146.
- [13] Eggert T, Wolter K, Ji J, et al. Distinct Functions of Senescence-Associated Immune Responses in Liver Tumor Surveillance and Tumor Progression. *Cancer cell* 2016;30:533-547.

- [14] Neubert L, Borchert P, Stark H, et al. Molecular Profiling of Vascular Remodeling in Chronic Pulmonary Disease. *The American journal of pathology* 2020;190:1382-1396.
- [15] Neubert L, Borchert P, Shin HO, et al. Comprehensive three-dimensional morphology of neoangiogenesis in pulmonary veno-occlusive disease and pulmonary capillary hemangiomas. *The journal of pathology Clinical research* 2019;5:108-114.
- [16] Mehlem A, Hagberg CE, Muhl L, et al. Imaging of neutral lipids by oil red O for analyzing the metabolic status in health and disease. *Nature protocols* 2013;8:1149-1154.
- [17] Sia D, Jiao Y, Martinez-Quetglas I, et al. Identification of an Immune-specific Class of Hepatocellular Carcinoma, Based on Molecular Features. *Gastroenterology* 2017;153:812-826.
- [18] **Montironi C, Castet F, Haber PK**, et al. Inflamed and non-inflamed classes of HCC: a revised immunogenomic classification. *Gut* 2023;72:129-140.
